# Supplementary material
Source: PubMed Central journal article supplement (PMC1986629)
Supplement: pnas_0706986104_2.pdf [file pnas_0706986104_2.pdf]

**Table 3. Transformation assays on RNAi lines**

| ABRC stock no. | Univ. of Arizona stock no. | Gene symbol        | Tumorigenesis* (A208) mutant/wild-type | No. of root segments assayed: tumors | Transient GUS activity* (At849) mutant/wild-type | No. of root segments assayed: GUS | Ppt or Kan-resistance* (At872 or 849) mutant/wild-type | No. of root segments assayed: Ppt <sup>r</sup> /Kan <sup>r</sup> | Resistance of the line <sup>†</sup> |
|----------------|----------------------------|--------------------|----------------------------------------|--------------------------------------|--------------------------------------------------|-----------------------------------|--------------------------------------------------------|------------------------------------------------------------------|-------------------------------------|
|                | T-FGC994A                  | <i>BRD12</i>       | 72.3/Ws: 72.3                          | 277                                  | 69.6/Ws: 71.8                                    | 342                               | 64.6/Ws: 70.6                                          | 268                                                              | PPT                                 |
|                | T-FGC994B                  | <i>BRD12</i>       | 66.8/Ws: 72.3                          | 235                                  | 69.8/Ws: 71.8                                    | 338                               | 65.7/Ws: 70.6                                          | 236                                                              | PPT                                 |
|                | T-FGC994C                  | <i>BRD12</i>       | 53.5/Ws: 72.3                          | 256                                  | 27.9/Ws: 71.8                                    | 272                               | 56.4/Ws: 70.6                                          | 165                                                              | PPT                                 |
|                | T-FGC994Dm                 | <i>BRD12</i>       | 59.1/Ws: 72.3                          | 198                                  | 54.0/Ws: 71.8                                    | 228                               | 69.1/Ws: 70.6                                          | 223                                                              | PPT                                 |
|                | T-FGC994E                  | <i>BRD12</i>       | 58.0/Ws: 72.3                          | 143                                  | 41.3/Ws: 71.8                                    | 259                               | 61.9/Ws: 70.6                                          | 218                                                              | PPT                                 |
| CS23958        | T-FGC878A                  | <i>BRD8</i>        | 68.5/Ws: 51.7                          | 445                                  | 79.2/Ws: 67.1                                    | 284                               | 80.8/Ws: 84.6                                          | 463                                                              | PPT                                 |
| CS30831        | TFGC197A                   | <i>CHB3</i>        | 69.1/Ws: 69.4                          | 246                                  | 30.2/Ws: 75.1                                    | 320                               | 37.7/Ws: 67.6                                          | 258                                                              | HPT                                 |
| CS30832        | TFGC197B                   | <i>CHB3</i>        | 60.2/Ws: 69.4                          | 231                                  | 762/Ws: 75.1                                     | 210                               | 43.2/Ws: 67.6                                          | 250                                                              | HPT                                 |
| CS30981        | T-FGC851B                  | <i>CHB4</i>        | 81.5/Ws: 73.1                          | 351                                  | 87.2/Ws: 64.2                                    | 501                               | 88.8/Ws: 85.2                                          | 428                                                              | PPT                                 |
| CS30980        | T-FGC851A                  | <i>CHB4</i>        | 79.3/Ws: 73.1                          | 328                                  | 74.6/Ws: 64.2                                    | 343                               | 87.9/Ws: 85.2                                          | 323                                                              | PPT                                 |
| CS32959        | T-FGC851Dm                 | <i>CHB4</i>        | 77.1/Ws: 51.7                          | 367                                  | 93.0/Ws: 67.1                                    | 271                               | 84.0/Ws: 84.6                                          | 461                                                              | PPT                                 |
| CS23960        | T-FGC851C                  | <i>CHB4</i>        | 57.7/Ws: 51.7                          | 376                                  | 68.3/Ws: 67.1                                    | 303                               | 76.7/Ws: 84.6                                          | 378                                                              | PPT                                 |
| <b>CS30982</b> | <b>T-FGC663A</b>           | <b><i>CHC1</i></b> | <b>17.8/Ws: 73.1</b>                   | <b>118</b>                           | <b>31.7/Ws: 65.9</b>                             | <b>227</b>                        | <b>22.2/Ws: 85.2</b>                                   | <b>144</b>                                                       | <b>PPT</b>                          |
| <b>CS23961</b> | <b>T-FGC663B</b>           | <b><i>CHC1</i></b> | <b>11.0/Ws: 51.7</b>                   | <b>82</b>                            | <b>16.1/Ws: 67.1</b>                             | <b>56</b>                         | <b>10.7/Ws: 84.6</b>                                   | <b>56</b>                                                        | <b>PPT</b>                          |
| CS30833        | TFGC105A                   | <i>CHE1</i>        | 41.7/Ws: 69.4                          | 199                                  | 63.2/Ws: 75.1                                    | 163                               | 34.2/Ws: 67.6                                          | 159                                                              | HPT                                 |
| CS30834        | TFGC105B                   | <i>CHE1</i>        | 58.7/Ws: 69.4                          | 271                                  | 68.8/Ws: 75.1                                    | 186                               | 66.0/Ws: 67.6                                          | 256                                                              | HPT                                 |
| CS30835        | TFGC105C                   | <i>CHE1</i>        | 52.9/Ws: 69.4                          | 206                                  | 77.1/Ws: 75.1                                    | 214                               | 40.0/Ws: 67.6                                          | 230                                                              | HPT                                 |
| CS30836        | TFGC105D                   | <i>CHE1</i>        | 47.6/Ws: 69.4                          | 189                                  | 60.2/Ws: 75.1                                    | 201                               | 43.4/Ws: 67.6                                          | 166                                                              | HPT                                 |
| CS30937        | TFGC163A                   | <i>CHR1</i>        | 63.6/Ws: 77.3                          | 404                                  | 70.5/Ws: 88.6                                    | 566                               | 74.4/Ws: 78.3                                          | 541                                                              | HPT                                 |
| <b>CS30938</b> | <b>TFGC163B</b>            | <b><i>CHR1</i></b> | <b>28.4/Ws: 65.1</b>                   | <b>201</b>                           | <b>56.3/Ws: 62.0</b>                             | <b>359</b>                        | <b>25.7/Ws: 57.8</b>                                   | <b>183</b>                                                       | <b>HPT</b>                          |
| CS30939        | TFGC163C                   | <i>CHR1</i>        | 43.0/Ws: 87.3                          | 399                                  | 60.5/Ws: 88.6                                    | 509                               | 48.9/Ws: 81.0                                          | 375                                                              | HPT                                 |
| CS30940        | TFGC163D                   | <i>CHR1</i>        | 33.6/Ws: 41.1                          | 274                                  | 50.4/Ws: 45.4                                    | 236                               | 34.9/Ws: 42.9                                          | 209                                                              | HPT                                 |
| CS30968        | T-FGC694Em                 | <i>CHR10</i>       | 51.7/Ws: 73.1                          | 364                                  | 49.0/Ws: 64.2                                    | 390                               | 70.8 /Ws: 85.2                                         | 356                                                              | PPT                                 |
| CS30969        | T-FGC694A                  | <i>CHR10</i>       | 75.0/Ws: 73.1                          | 296                                  | 73.0/Ws: 64.2                                    | 355                               | 79.4/Ws: 85.2                                          | 349                                                              | PPT                                 |
| CS23962        | T-FGC694B                  | <i>CHR10</i>       | 79.1/Ws: 51.7                          | 369                                  | 64.8/Ws: 67.1                                    | 386                               | 82.9/Ws: 84.6                                          | 293                                                              | PPT                                 |
| CS23963        | T-FGC694C                  | <i>CHR10</i>       | 71.3/Ws: 60.6                          | 369                                  | 86.1/Ws: 67.6                                    | 281                               | 69.4/Ws: 73.4                                          | 409                                                              | PPT                                 |
| CS23964        | T-FGC694D                  | <i>CHR10</i>       | 73.7/Ws: 60.6                          | 392                                  | 84.1/Ws: 67.6                                    | 339                               | 80.3/Ws: 73.4                                          | 426                                                              | PPT                                 |
|                | T-FGC649F                  | <i>CHR11</i>       | 32.0/Ws: 67.5                          | 500                                  | 44.1/Ws: 68.4                                    | 696                               | 71.2/Ws: 82.7                                          | 619                                                              | PPT                                 |
| CS30972        | T-FGC649C                  | <i>CHR11</i>       | 67.6/Ws: 70.2                          | 447                                  | 49.9/Ws: 59.3                                    | 347                               | 89.7/Ws: 91.7                                          | 458                                                              | PPT                                 |
| CS30973        | T-FGC649D                  | <i>CHR11</i>       | 54.9/Ws: 70.2                          | 450                                  | 45.1/Ws: 59.3                                    | 324                               | 94.5/Ws: 91.7                                          | 346                                                              | PPT                                 |
| CS30974        | T-FGC649E                  | <i>CHR11</i>       | 57.5/Ws: 70.2                          | 395                                  | 63.8/Ws: 59.3                                    | 491                               | 95.6/Ws: 91.7                                          | 337                                                              | PPT                                 |
| CS30970        | T-FGC649A                  | <i>CHR11</i>       | 46.1/Ws: 70.2                          | 484                                  | 51.8/Ws: 59.3                                    | 427                               | 91.6/Ws: 91.7                                          | 345                                                              | PPT                                 |
| CS30971        | T-FGC649B                  | <i>CHR11</i>       | 42.3/Ws: 70.2                          | 326                                  | 60.3/Ws: 59.3                                    | 390                               | 89.6/Ws: 91.7                                          | 221                                                              | PPT                                 |
| CS30975        | T-FGC629A                  | <i>CHR14</i>       | 65.2/Ws: 70.2                          | 448                                  | 68.0/Ws: 59.3                                    | 344                               | 92.0/Ws: 91.7                                          | 463                                                              | PPT                                 |
| CS30976        | T-FGC629B                  | <i>CHR14</i>       | 72.6/Ws: 70.2                          | 412                                  | 64.4/Ws: 59.3                                    | 509                               | 92.6/Ws: 91.7                                          | 390                                                              | PPT                                 |

| ABRC stock no. | Univ. of Arizona stock no. | Gene symbol  | Tumorigenesis* (A208) mutant/wild-type | No. of root segments assayed: tumors | Transient GUS activity* (At849) mutant/wild-type | No. of root segments assayed: GUS | Ppt or Kan-resistance* (At872 or 849) mutant/wild-type | No. of root segments assayed: Ppt <sup>r</sup> /Kan <sup>r</sup> | Resistance of the line <sup>†</sup> |
|----------------|----------------------------|--------------|----------------------------------------|--------------------------------------|--------------------------------------------------|-----------------------------------|--------------------------------------------------------|------------------------------------------------------------------|-------------------------------------|
| CS30977        | T-FGC629C                  | <i>CHR14</i> | 45.3/Ws: 70.2                          | 256                                  | 68.3/Ws: 59.3                                    | 378                               | 85.9/Ws: 91.7                                          | 320                                                              | PPT                                 |
| CS30978        | T-FGC706A                  | <i>CHR15</i> | 73.4/Ws: 83.5                          | 395                                  | 85.0/Ws: 91.2                                    | 560                               | 62.6/Ws: 82.3                                          | 370                                                              | PPT                                 |
|                | T-FGC706B                  | <i>CHR15</i> | 40.5/Ws: 72.3                          | 294                                  | 53.4/Ws: 71.8                                    | 253                               | 62.4/Ws: 70.6                                          | 205                                                              | PPT                                 |
|                | T-FGC706C                  | <i>CHR15</i> | 46.2/Ws: 72.3                          | 197                                  | 43.2/Ws: 71.8                                    | 266                               | 62.9/Ws: 70.6                                          | 210                                                              | PPT                                 |
| CS30840        | TFGC692A                   | <i>CHR16</i> | 45.5/Ws: 64.3                          | 220                                  | 46.7/Ws: 83.7                                    | 439                               | 58.0/Ws: 74.9                                          | 404                                                              | PPT                                 |
| CS30841        | TFGC692B                   | <i>CHR16</i> | 50.9/Ws: 64.3                          | 322                                  | 45.2/Ws: 83.7                                    | 374                               | 74.0/Ws: 74.9                                          | 354                                                              | PPT                                 |
| CS30965        | T-FGC692Cm                 | <i>CHR16</i> | 80.0/Ws: 83.5                          | 399                                  | 89.4/Ws: 91.2                                    | 291                               | 69.0/Ws: 82.3                                          | 281                                                              | PPT                                 |
| CS23966        | T-FGC692D                  | <i>CHR16</i> | 57.7/Ws: 51.7                          | 307                                  | 58.5/Ws: 67.1                                    | 318                               | 71.0/Ws: 84.6                                          | 238                                                              | PPT                                 |
| CS30896        | TFGC762A                   | <i>CHR18</i> | 53.0/Ws: 72.2                          | 602                                  | 28.3/Ws: 67.4                                    | 385                               | 69.4/Ws: 69.6                                          | 490                                                              | PPT                                 |
| CS30897        | TFGC762B                   | <i>CHR18</i> | 64.4/Ws: 83.4                          | 303                                  | 17.2/Ws: 23.5                                    | 377                               | 45.1/Ws: 58.3                                          | 401                                                              | PPT                                 |
| CS30898        | TFGC762C                   | <i>CHR18</i> | 35.9/Ws: 83.4                          | 234                                  | 20.1/Ws: 23.5                                    | 259                               | 64.3/Ws: 58.3                                          | 297                                                              | PPT                                 |
| CS30899        | TFGC762D                   | <i>CHR18</i> | 57.0/Ws: 59.4                          | 393                                  | 70.6/Ws: 67.4                                    | 411                               | 92.0/Ws: 85.6                                          | 437                                                              | PPT                                 |
| CS30968        | T-FGC762Em                 | <i>CHR18</i> | 69.3/Ws: 83.5                          | 388                                  | 71.0/Ws: 91.2                                    | 414                               | 70.7/Ws: 82.3                                          | 290                                                              | PPT                                 |
| CS30969        | T-FGC762Fm                 | <i>CHR18</i> | 75.0/Ws: 83.5                          | 344                                  | 62.6/Ws: 91.2                                    | 476                               | 72.0/Ws: 82.3                                          | 378                                                              | PPT                                 |
| CS30967        | T-FGC762G                  | <i>CHR18</i> | 78.6/Ws: 83.5                          | 429                                  | 72.3/Ws: 91.2                                    | 451                               | 68.9/Ws: 82.3                                          | 488                                                              | PPT                                 |
| CS30931        | TFGC763A                   | <i>CHR19</i> | 66.5/Ws: 50.8                          | 212                                  |                                                  |                                   | 74.2/Ws: 69.4                                          | 294                                                              | PPT                                 |
| CS30932        | TFGC763B                   | <i>CHR19</i> | 42.6/Ws: 50.8                          | 282                                  | 88.0/Ws: 55.1                                    | 175                               | 70.9/Ws: 69.4                                          | 350                                                              | PPT                                 |
| CS30933        | TFGC763C                   | <i>CHR19</i> | 46.1/Ws: 81.9                          | 303                                  | 58.5/Ws: 66.1                                    | 347                               | 80.0/Ws: 87.4                                          | 841                                                              | PPT                                 |
| CS30934        | TFGC763D                   | <i>CHR19</i> | 45.2/Ws: 50.8                          | 330                                  | 78.1/Ws: 55.1                                    | 301                               | 63.4/Ws: 69.4                                          | 243                                                              | PPT                                 |
| CS30935        | TFGC763E                   | <i>CHR19</i> | 48.0/Ws: 50.4                          | 367                                  |                                                  |                                   | 41.69/Ws: 49.2                                         | 415                                                              | PPT                                 |
| CS30936        | TFGC763F                   | <i>CHR19</i> | 60.7/Ws: 59.4                          | 272                                  | 65.2/Ws: 67.4                                    | 204                               | 92.9/Ws: 85.6                                          | 309                                                              | PPT                                 |
| CS24016        | T-FGC763G                  | <i>CHR19</i> | 56.7/Ws: 56.0                          | 330                                  | 73.4/Ws: 66.8                                    | 402                               | 74.2/Ws: 76.5                                          | 383                                                              | PPT                                 |
| CS24017        | T-FGC763H                  | <i>CHR19</i> | 55.8/Ws: 56.0                          | 493                                  | 76.7/Ws: 66.8                                    | 421                               | 73.1/Ws: 76.5                                          | 421                                                              | PPT                                 |
| CS30900        | TFGC140A                   | <i>CHR2</i>  | 59.1/Ws: 63.6                          | 164                                  |                                                  |                                   | 56.6/Ws: 99.2                                          | 226                                                              | HPT                                 |
| CS30901        | TFGC140B                   | <i>CHR2</i>  | 36.8/Ws: 63.6                          | 397                                  |                                                  |                                   | 39.0/Ws: 99.2                                          | 371                                                              | HPT                                 |
| CS30902        | TFGC140C                   | <i>CHR2</i>  | 56.7/Ws: 63.6                          | 208                                  | 30.0/Ws: 25.2                                    | 144                               | 43.9/Ws: 99.2                                          | 126                                                              | HPT                                 |
|                | T-FGC764C                  | <i>CHR20</i> | 76.6/Ws: 83.5                          | 398                                  | 88.5/Ws: 91.2                                    | 566                               | 72.3/Ws: 82.3                                          | 430                                                              | PPT                                 |
|                | T-FGC764C                  | <i>CHR20</i> | 74.9/Ws: 83.5                          | 371                                  | 78.7/Ws: 91.2                                    | 384                               | 71.3/Ws: 82.3                                          | 334                                                              | PPT                                 |
|                | T-FGC764B                  | <i>CHR20</i> | 73.5/Ws: 83.5                          | 419                                  | 61.5/Ws: 91.2                                    | 524                               | 69.0/Ws: 82.3                                          | 390                                                              | PPT                                 |
| CS24018        | T-FGC765A                  | <i>CHR21</i> | 62.9/Ws: 56.0                          | 415                                  | 66.3/Ws: 66.8                                    | 406                               | 82.9/Ws: 76.5                                          | 403                                                              | PPT                                 |
| CS24019        | T-FGC765B                  | <i>CHR21</i> | 48.8/Ws: 56.0                          | 377                                  | 59.4/Ws: 66.8                                    | 389                               | 72.9/Ws: 76.5                                          | 369                                                              | PPT                                 |
| CS24031        | T-FGC778Bm                 | <i>CHR22</i> | 59.9/Ws: 69.4                          | 384                                  | 43.0/Ws: 66.6                                    | 456                               | 82.0/Ws: 75.5                                          | 334                                                              | PPT                                 |
|                | T-FGC778D                  | <i>CHR22</i> | 66.1/Ws: 69.4                          | 304                                  | 52.4/Ws: 66.6                                    | 361                               | 81.9/Ws: 75.5                                          | 359                                                              | PPT                                 |
| CS30979        | T-FGC778A                  | <i>CHR22</i> | 49.1/Ws: 69.4                          | 324                                  | 60.6/Ws: 66.6                                    | 411                               | 72.6/Ws: 75.5                                          | 303                                                              | PPT                                 |
| CS24032        | T-FGC778C                  | <i>CHR22</i> | 62.7/Ws: 69.4                          | 303                                  | 46.7/Ws: 66.6                                    | 315                               | 81.0/Ws: 75.5                                          | 385                                                              | PPT                                 |
| CS30837        | TFGC107A                   | <i>CHR4</i>  | 68.5/Ws: 69.4                          | 257                                  | 67.5/Ws: 75.1                                    | 228                               | 43.8/Ws: 67.6                                          | 274                                                              | HPT                                 |

| ABRC stock no. | Univ. of Arizona stock no. | Gene symbol        | Tumorigenesis* (A208) mutant/wild-type | No. of root segments assayed: tumors | Transient GUS activity* (At849) mutant/wild-type | No. of root segments assayed: GUS | Ppt or Kan-resistance* (At872 or 849) mutant/wild-type | No. of root segments assayed: Ppt <sup>r</sup> /Kan <sup>r</sup> | Resistance of the line <sup>†</sup> |
|----------------|----------------------------|--------------------|----------------------------------------|--------------------------------------|--------------------------------------------------|-----------------------------------|--------------------------------------------------------|------------------------------------------------------------------|-------------------------------------|
| CS30838        | TFGC107B                   | <i>CHR4</i>        | 48.1/Ws: 69.4                          | 183                                  | 64.5/Ws: 75.1                                    | 242                               | 50.0/Ws: 67.6                                          | 258                                                              | HPT                                 |
| CS30839        | TFGC107C                   | <i>CHR4</i>        | 44.3/Ws: 73.0                          | 375                                  | 66.2/Ws: 72.7                                    | 500                               | 68.7/Ws: 62.2                                          | 372                                                              | HPT                                 |
| CS30966        | T-FGC856Am                 | <i>CHR5</i>        | 59.8/Ws: 73.1                          | 244                                  | 52.0/Ws: 64.2                                    | 248                               | 83.3/Ws: 85.2                                          | 234                                                              | PPT                                 |
|                | T-FGC856B                  | <i>CHR5</i>        | 41.0/Ws: 72.3                          | 222                                  | 33.1/Ws: 71.8                                    | 245                               | 56.7/Ws: 70.6                                          | 180                                                              | PPT                                 |
|                | T-FGC856C                  | <i>CHR5</i>        | 49.8/Ws: 72.3                          | 237                                  | 53.9/Ws: 71.8                                    | 230                               | 67.5/Ws: 70.6                                          | 280                                                              | PPT                                 |
| CS3966         | TFGC231A                   | <i>CHR6</i>        | 37.0/Ws:70.8                           |                                      |                                                  |                                   |                                                        |                                                                  | HPT                                 |
| CS3967         | TFGC231B                   | <i>CHR6</i>        | 59.7/Ws:70.8                           |                                      |                                                  |                                   |                                                        |                                                                  | HPT                                 |
| CS3968         | TFGC231C                   | <i>CHR6</i>        | 36.9/Ws:70.8                           |                                      |                                                  |                                   |                                                        |                                                                  | HPT                                 |
| CS30967        | T-FGC118A                  | <i>CHR9</i>        | 72.5/Ws: 81.2                          | 389                                  | 82.3/Ws: 84.8                                    | 440                               | 58.3/Ws: 65.5                                          | 405                                                              | HPT                                 |
|                | T-FGD105A                  | <i>CRD1</i>        | 50.2/Ws: 69.6                          | 299                                  | 55.2/Ws: 79.0                                    | 58                                | 82.1/Ws: 81.4                                          | 221                                                              | HYG                                 |
|                | T-FGD105B                  | <i>CRD1</i>        | 51.7/Ws: 69.6                          | 234                                  | 55.2/Ws: 79.0                                    | 344                               | 85.0/Ws: 81.4                                          | 246                                                              | HYG                                 |
| CS30941        | TFGC131A                   | <i>DMT1</i>        | 44.5/Ws: 41.1                          | 229                                  | 47.8/Ws: 45.4                                    | 410                               | 52.2/Ws:42.9                                           | 312                                                              | HPT                                 |
| CS30942        | TFGC131B                   | <i>DMT1</i>        | 54.8/Ws: 41.1                          | 272                                  | 70.8/Ws: 45.4                                    | 284                               | 41.8/Ws:42.9                                           | 316                                                              | HPT                                 |
| CS30943        | TFGC131C                   | <i>DMT1</i>        | 73.1/Ws: 65.1                          | 346                                  | 67.7/Ws: 62.0                                    | 344                               | 62.8/Ws:57.8                                           | 364                                                              | HPT                                 |
| <b>CS30944</b> | <b>TFGC131D</b>            | <b><i>DMT1</i></b> | <b>16.4/Ws: 58.1</b>                   | <b>197</b>                           | <b>47.8/Ws: 66.1</b>                             | <b>133</b>                        | <b>23.5/Ws:68.9</b>                                    | <b>119</b>                                                       | <b>HPT</b>                          |
| CS30945        | TFGC131E                   | <i>DMT1</i>        | 45.4/Ws: 65.1                          | 313                                  | 61.9/Ws: 62.0                                    | 367                               | 72.4/Ws:57.8                                           | 313                                                              | HPT                                 |
| <b>CS30946</b> | <b>TFGC131F</b>            | <b><i>DMT1</i></b> | <b>19.4/Ws: 58.1</b>                   | <b>402</b>                           | <b>61.6/Ws: 66.1</b>                             | <b>219</b>                        | <b>55.1/Ws:68.9</b>                                    | <b>361</b>                                                       | <b>HPT</b>                          |
| CS30884        | TFGC185A                   | <i>DMT2</i>        | 53.7/Ws: 71.3                          | 287                                  | 36.1/Ws: 75.1                                    | 380                               | 63.3/Ws:68.2                                           | 338                                                              | HPT                                 |
| <b>CS30885</b> | <b>TFGC185B</b>            | <b><i>DMT2</i></b> | <b>32.4/Ws: 73.2</b>                   | <b>454</b>                           | <b>30.6/Ws: 55.1</b>                             | <b>577</b>                        | <b>44.2/Ws: 69.4</b>                                   | <b>273</b>                                                       | <b>HPT</b>                          |
| CS30886        | TFGC185C                   | <i>DMT2</i>        | 34.4/Ws: 67.9                          | 495                                  | 47.2/Ws: 66.5                                    | 311                               | 59.1/Ws:68.2                                           | 259                                                              | HPT                                 |
|                | T-FGC946B                  | <i>DMT4</i>        | 43.9/Ws: 60.1                          | 305                                  | 43.3/Ws: 65.1                                    | 238                               | 53.3/Ws: 58.1                                          | 334                                                              | PPT                                 |
|                | T-FGC946Cm                 | <i>DMT4</i>        | 65.5/Ws: 60.1                          | 301                                  | 38.7/Ws: 65.1                                    | 302                               | 60.6/Ws: 58.1                                          | 436                                                              | PPT                                 |
|                | <b>T-FGC946D</b>           | <b><i>DMT4</i></b> | <b>29.9/Ws: 60.1</b>                   | <b>321</b>                           | <b>36.9/Ws: 65.1</b>                             | <b>255</b>                        | <b>58.0/Ws: 58.1</b>                                   | <b>295</b>                                                       | <b>PPT</b>                          |
| CS23970        | T-FGC946A                  | <i>DMT4</i>        | 53.4/Ws: 60.4                          | 191                                  | 73.6/Ws: 76.0                                    | 330                               | 61.6/Ws: 78.2                                          | 219                                                              | PPT                                 |
| CS30842        | TFGC438A                   | <i>DMT5</i>        | 61.8/Ws: 73.0                          | 390                                  | 62.3/Ws: 72.7                                    | 488                               | 54.2/Ws: 62.2                                          | 410                                                              | HPT                                 |
| CS30843        | TFGC438B                   | <i>DMT5</i>        | 65.8/Ws: 73.0                          | 319                                  | 75.9/Ws: 72.7                                    | 332                               | 50.9/Ws: 62.2                                          | 342                                                              | HPT                                 |
| CS30844        | TFGC438C                   | <i>DMT5</i>        | 61.8/Ws: 73.0                          | 259                                  | 63.3/Ws: 72.7                                    | 428                               | 61.7/Ws: 62.2                                          | 436                                                              | HPT                                 |
|                | T-FGC844Bm                 | <i>DMT6</i>        | 40.2/Ws: 72.3                          | 194                                  | 39.3/Ws: 71.8                                    | 316                               | 68.3/Ws: 70.6                                          | 186                                                              | PPT                                 |
| CS30971        | T-FGC857B                  | <i>DMT7</i>        | 57.8/Ws: 69.4                          | 355                                  | 52.4/Ws: 66.6                                    | 332                               | 79.4/Ws: 75.5                                          | 296                                                              | PPT                                 |
| CS30972        | T-FGC857Cm                 | <i>DMT7</i>        | 81.3/Ws: 69.4                          | 400                                  | 49.6/Ws: 66.6                                    | 502                               | 79.7/Ws: 75.5                                          | 370                                                              | PPT                                 |
| CS30973        | T-FGC857A                  | <i>DMT7</i>        | 85.3/Ws: 74.2                          | 354                                  | 85.0/Ws: 82.8                                    | 499                               | 72.6/Ws: 78.1                                          | 376                                                              | PPT                                 |
| CS30845        | TFGC621A                   | <i>GTA2</i>        | 45.5/Ws: 64.3                          | 292                                  | 43.1/Ws: 83.7                                    | 390                               | 80.5/Ws: 74.9                                          | 392                                                              | PPT                                 |
| CS30846        | TFGC621B                   | <i>GTA2</i>        | 68.5/Ws: 64.3                          | 372                                  | 43.2/Ws: 83.7                                    | 555                               | 79.1/Ws: 74.9                                          | 387                                                              | PPT                                 |
| CS30847        | TFGC621C                   | <i>GTA2</i>        | 44.0/Ws: 64.3                          | 209                                  | 62.7/Ws: 83.7                                    | 257                               | 88.3/Ws: 74.9                                          | 240                                                              | PPT                                 |
| CS30848        | TFGC621D                   | <i>GTA2</i>        | 51.3/Ws: 64.3                          | 357                                  | 50.1/Ws: 83.7                                    | 383                               | 83.2/Ws: 74.9                                          | 463                                                              | PPT                                 |
| CS30849        | TFGC621E                   | <i>GTA2</i>        | 58.3/Ws: 64.3                          | 338                                  | 62.6/Ws: 83.7                                    | 353                               | 89.2/Ws: 74.9                                          | 417                                                              | PPT                                 |

| ABRC stock no. | Univ. of Arizona stock no. | Gene symbol        | Tumorigenesis* (A208) mutant/wild-type | No. of root segments assayed: tumors | Transient GUS activity* (At849) mutant/wild-type | No. of root segments assayed: GUS | Ppt or Kan-resistance* (At872 or 849) mutant/wild-type | No. of root segments assayed: Ppt <sup>r</sup> /Kan <sup>r</sup> | Resistance of the line <sup>†</sup> |
|----------------|----------------------------|--------------------|----------------------------------------|--------------------------------------|--------------------------------------------------|-----------------------------------|--------------------------------------------------------|------------------------------------------------------------------|-------------------------------------|
|                | T-FGC885A                  | <i>GTC1</i>        | 81.6/Ws: 74.2                          | 402                                  | 56.0/Ws: 82.8                                    | 477                               | 77.9/Ws: 78.1                                          | 403                                                              | PPT                                 |
|                | T-FGC885B                  | <i>GTC1</i>        | 80.2/Ws: 74.2                          | 373                                  | 81.3/Ws: 82.8                                    | 331                               | 72.5/Ws: 78.1                                          | 375                                                              | PPT                                 |
|                | T-FGC885C                  | <i>GTC1</i>        | 80.9/Ws: 74.2                          | 451                                  | 82.4/Ws: 82.8                                    | 471                               | 77.9/Ws: 78.1                                          | 384                                                              | PPT                                 |
| CS30850        | T-FGC699A                  | <i>GTE1</i>        | 53.5/Ws: 64.3                          | 314                                  | 51.9/Ws: 83.7                                    | 337                               | 69.6/Ws: 74.9                                          | 312                                                              | PPT                                 |
| CS30851        | T-FGC699B                  | <i>GTE1</i>        | 57.7/Ws: 59.4                          | 220                                  | 64.4/Ws: 67.4                                    | 320                               | 73.3/Ws: 85.6                                          | 212                                                              | PPT                                 |
| CS30852        | T-FGC699C                  | <i>GTE1</i>        | 53.0/Ws: 59.4                          | 351                                  | 43.8/Ws: 67.4                                    | 411                               | 80.9/Ws: 85.6                                          | 346                                                              | PPT                                 |
| CS30853        | T-FGC699D                  | <i>GTE1</i>        | 64.6/Ws: 59.4                          | 367                                  | 64.5/Ws: 67.4                                    | 380                               | 52.1/Ws: 85.6                                          | 217                                                              | PPT                                 |
| <b>CS23973</b> | <b>TFGC698Am</b>           | <b><i>GTE2</i></b> | <b>23.1/Ws: 60.4</b>                   | <b>282</b>                           | <b>74.3/Ws: 76.0</b>                             | <b>335</b>                        | <b>39.1/Ws: 78.2</b>                                   | <b>253</b>                                                       | <b>PPT</b>                          |
| CS23974        | T-FGC698B                  | <i>GTE2</i>        | 51.2/Ws: 60.4                          | 289                                  | 85.4/Ws: 76.0                                    | 287                               | 44.3/Ws: 78.2                                          | 253                                                              | PPT                                 |
| CS30984        | T-FGC700Am                 | <i>GTE3</i>        | 86.9/Ws: 74.2                          | 350                                  | 78.6/Ws: 82.8                                    | 289                               | 79.7/Ws: 78.1                                          | 379                                                              | PPT                                 |
| CS23975        | T-FGC700Bm                 | <i>GTE3</i>        | 44.5/Ws: 60.4                          | 227                                  | 45.6/Ws: 76.0                                    | 327                               | 70.2/Ws: 78.2                                          | 248                                                              | PPT                                 |
|                | <b>T-FGC708B</b>           | <b><i>GTE4</i></b> | <b>39.7/Ws: 60.1</b>                   | <b>287</b>                           | <b>11.6/Ws: 65.1</b>                             | <b>242</b>                        | <b>39.5/Ws: 58.1</b>                                   | <b>324</b>                                                       | <b>PPT</b>                          |
|                | T-FGC708C                  | <i>GTE4</i>        | 57.1/Ws: 60.1                          | 268                                  | 37.8/Ws: 65.1                                    | 275                               | 60.9/Ws: 58.1                                          | 366                                                              | PPT                                 |
|                | <b>T-FGC708D</b>           | <b><i>GTE4</i></b> | <b>21.8/Ws: 72.3</b>                   | <b>165</b>                           | <b>36.9/Ws: 71.8</b>                             | <b>309</b>                        | <b>35.4/Ws: 70.6</b>                                   | <b>181</b>                                                       | <b>PPT</b>                          |
|                | T-FGC708A                  | <i>GTE4</i>        | 62.2/Ws: 60.1                          | 325                                  | 60.5/Ws: 65.1                                    | 367                               | 65.4/Ws: 58.1                                          | 428                                                              | PPT                                 |
| CS24034        | T-FGC702B                  | <i>GTE5</i>        | 42.1/Ws: 74.2                          | 264                                  | 73.2/Ws: 82.8                                    | 250                               | 57.9/Ws: 78.1                                          | 221                                                              | PPT                                 |
| CS24033        | T-FGC702A                  | <i>GTE5</i>        | 71.0/Ws: 74.2                          | 397                                  | 85.0/Ws: 82.8                                    | 479                               | 78.4/Ws: 78.1                                          | 343                                                              | PPT                                 |
| CS24035        | T-FGC702C                  | <i>GTE5</i>        | 75.6/Ws: 83.3                          | 327                                  | 75.7/Ws: 76.9                                    | 280                               | 58.3/Ws: 65.5                                          | 405                                                              | PPT                                 |
|                | T-FGC702D                  | <i>GTE5</i>        | 78.0/Ws: 83.3                          | 386                                  | 88.0/Ws: 76.9                                    | 368                               | 80.1/Ws: 65.5                                          | 322                                                              | PPT                                 |
| CS30985        | T-FGC959A                  | <i>GTE6</i>        | 89.7/Ws: 83.3                          | 370                                  | 80.3/Ws: 76.9                                    | 375                               | 68.7/Ws: 65.5                                          | 233                                                              | PPT                                 |
| CS30986        | T-FGC959B                  | <i>GTE6</i>        | 81.5/Ws: 83.3                          | 340                                  | 84.7/Ws: 76.9                                    | 320                               | 75.8/Ws: 65.5                                          | 227                                                              | PPT                                 |
|                | 9594.1F2                   | <i>GTE6</i>        | 75.6/Ws: 83.3                          | 336                                  | 85.0/Ws: 76.9                                    | 366                               | 85.7/Ws: 65.5                                          | 252                                                              | PPT                                 |
| CS30986        | T-FGC959B                  | <i>GTE6</i>        | 81.6/Ws: 83.3                          | 337                                  | 84.2/Ws: 76.9                                    | 361                               | 63.2/Ws: 65.5                                          | 334                                                              | PPT                                 |
| <b>CS23976</b> | <b>T-FGC992A</b>           | <b><i>GTE7</i></b> | <b>31.9/Ws: 60.4</b>                   | <b>210</b>                           | <b>73.9/Ws: 76.0</b>                             | <b>352</b>                        | <b>63.8/Ws: 78.2</b>                                   | <b>232</b>                                                       | <b>PPT</b>                          |
|                | <b>T-FGC992D</b>           | <b><i>GTE7</i></b> | <b>33.6/Ws: 60.4</b>                   | <b>262</b>                           | <b>90.6/Ws: 76.0</b>                             | <b>374</b>                        | <b>30.0/Ws: 78.2</b>                                   | <b>237</b>                                                       | <b>PPT</b>                          |
| <b>CS23978</b> | <b>TFGC992Cm</b>           | <b><i>GTE7</i></b> | <b>18.4/Ws: 60.4</b>                   | <b>114</b>                           | <b>33.3/Ws: 76.0</b>                             | <b>228</b>                        | <b>42.5/Ws: 78.2</b>                                   | <b>247</b>                                                       | <b>PPT</b>                          |
| <b>CS23977</b> | <b>T-FGC992B</b>           | <b><i>GTE7</i></b> | <b>33.6/Ws: 60.4</b>                   | <b>262</b>                           | <b>71.4/Ws: 76.0</b>                             | <b>342</b>                        | <b>40.7/Ws: 78.2</b>                                   | <b>268</b>                                                       | <b>PPT</b>                          |
| <b>CS30906</b> | <b>TFGC439D</b>            | <b><i>HAC1</i></b> | <b>19.0/Ws: 83.4</b>                   | <b>284</b>                           | <b>54.0/Ws: 88.6</b>                             | <b>427</b>                        | <b>28.9/Ws: 58.3</b>                                   | <b>273</b>                                                       | <b>HPT</b>                          |
| CS30903        | T-FGC439A                  | <i>HAC1</i>        | 58.8/Ws: 69.6                          | 466                                  | 64.4/Ws: 79.0                                    | 371                               | 80.8/Ws: 81.4                                          | 411                                                              | HYG                                 |
| CS30904        | T-FGC439B                  | <i>HAC1</i>        | 45.5/Ws: 69.6                          | 253                                  | 60.6/Ws: 79.0                                    | 246                               | 72.7/Ws: 81.4                                          | 227                                                              | HYG                                 |
| CS30854        | TFGC187A                   | <i>HAC2</i>        | 72.2/Ws: 73.0                          | 363                                  | 74.3/Ws: 72.7                                    | 288                               | 55.2/Ws: 62.2                                          | 355                                                              | HPT                                 |
| CS30855        | TFGC187B                   | <i>HAC2</i>        | 53.3/Ws: 73.0                          | 227                                  | 58.5/Ws: 72.7                                    | 188                               | 33.8/Ws: 62.2                                          | 210                                                              | HPT                                 |
| CS30856        | TFGC627A                   | <i>HAC4</i>        | 58.1/Ws: 81.4                          | 346                                  | 64.4/Ws: 80.4                                    | 292                               | 88.8/Ws: 90.4                                          | 311                                                              | PPT                                 |
| CS30857        | TFGC627B                   | <i>HAC4</i>        | 52.0/Ws: 81.4                          | 246                                  | 81.4/Ws: 80.4                                    | 226                               | 70.7/Ws: 90.4                                          | 392                                                              | PPT                                 |
| CS30987        | T-FGC627C                  | <i>HAC4</i>        | 82.6/Ws: 83.3                          | 321                                  | 78.0/Ws: 76.9                                    | 259                               | 56.8/Ws: 65.5                                          | 315                                                              | PPT                                 |
| CS30988        | T-FGC627D                  | <i>HAC4</i>        | 80.7/Ws: 86.3                          | 290                                  | 69.5/Ws: 75.8                                    | 371                               | 74.3/Ws: 72.7                                          | 242                                                              | PPT                                 |

| ABRC stock no. | Univ. of Arizona stock no. | Gene symbol         | Tumorigenesis* (A208) mutant/wild-type | No. of root segments assayed: tumors | Transient GUS activity* (At849) mutant/wild-type | No. of root segments assayed: GUS | Ppt or Kan-resistance* (At872 or 849) mutant/wild-type | No. of root segments assayed: Ppt <sup>r</sup> /Kan <sup>r</sup> | Resistance of the line <sup>†</sup> |
|----------------|----------------------------|---------------------|----------------------------------------|--------------------------------------|--------------------------------------------------|-----------------------------------|--------------------------------------------------------|------------------------------------------------------------------|-------------------------------------|
| CS24020?       | T-FGC638A                  | <i>HAC5</i>         | 64.0/Ws: 56.0                          | 336                                  | 73.7/Ws: 66.8                                    | 353                               | 73.7/Ws: 76.5                                          | 426                                                              | PPT                                 |
| CS24021        | T-FGC638B                  | <i>HAC5</i>         | 43.4/Ws: 56.0                          | 256                                  | 77.8/Ws: 66.8                                    | 297                               | 68.6/Ws: 76.5                                          | 242                                                              | PPT                                 |
| CS24022        | T-FGC638C                  | <i>HAC5</i>         | 70.0/Ws: 56.0                          | 327                                  | 58.2/Ws: 66.8                                    | 323                               | 75.6/Ws: 76.5                                          | 295                                                              | PPT                                 |
| CS24023        | T-FGC638D                  | <i>HAC5</i>         | 62.3/Ws: 60.6                          | 302                                  | 74.0/Ws: 67.6                                    | 312                               | 78.2/Ws: 73.4                                          | 418                                                              | PPT                                 |
| CS24024        | T-FGC638E                  | <i>HAC5</i>         | 76.6/Ws: 60.6                          | 295                                  | 77.3/Ws: 67.6                                    | 335                               | 72.9/Ws: 73.4                                          | 377                                                              | PPT                                 |
| <b>CS30866</b> | <b>TFGC638A</b>            | <b><i>HAF1</i></b>  | <b>20.6/Ws: 81.4</b>                   | <b>287</b>                           | <b>42.3/Ws: 80.4</b>                             | <b>291</b>                        | <b>50.4/Ws: 90.4</b>                                   | <b>307</b>                                                       | <b>PPT</b>                          |
| <b>CS30867</b> | <b>TFGC638B</b>            | <b><i>HAF1</i></b>  | <b>25.6/Ws: 81.4</b>                   | <b>250</b>                           | <b>32.5/Ws: 80.4</b>                             | <b>191</b>                        | <b>49.8/Ws: 90.4</b>                                   | <b>215</b>                                                       | <b>PPT</b>                          |
| <b>CS30868</b> | <b>TFGC638C</b>            | <b><i>HAF1</i></b>  | <b>24.4/Ws: 73.1</b>                   | <b>246</b>                           | <b>44.1/Ws: 66.6</b>                             | <b>242</b>                        | <b>67.9/Ws: 85.2</b>                                   | <b>247</b>                                                       | <b>PPT</b>                          |
| <b>CS30869</b> | <b>TFGC638D</b>            | <b><i>HAF1</i></b>  | <b>19.3/Ws: 59.4</b>                   | <b>166</b>                           | <b>44.7/Ws: 67.4</b>                             | <b>150</b>                        | <b>48.2/Ws: 85.6</b>                                   | <b>189</b>                                                       | <b>PPT</b>                          |
| <b>CS30870</b> | <b>TFGC638E</b>            | <b><i>HAF1</i></b>  | <b>34.0/Ws: 59.4</b>                   | <b>144</b>                           | <b>39.3/Ws: 67.4</b>                             | <b>150</b>                        | <b>68.1/Ws: 85.6</b>                                   | <b>213</b>                                                       | <b>PPT</b>                          |
| CS30927        | TFGC635A                   | <i>HAG1</i>         | 33.3/Ws: 50.8                          | 237                                  |                                                  |                                   | 57.2/Ws:69.4                                           | 226                                                              | PPT                                 |
| CS30928        | TFGC635B                   | <i>HAG1</i>         | 81.8/Ws: 81.9                          | 358                                  | 85.0/Ws: 66.4                                    | 293                               | 85.5/Ws:87.4                                           | 325                                                              | PPT                                 |
| CS30929        | TFGC635C                   | <i>HAG1</i>         | 49.4/Ws: 58.1                          | 330                                  | 62.6/Ws: 66.1                                    | 310                               | 54.9/Ws:68.9                                           | 355                                                              | PPT                                 |
| CS30930        | TFGC635D                   | <i>HAG1</i>         | 62.2/Ws: 50.4                          | 360                                  |                                                  |                                   | 48.61/Ws:49.2                                          | 323                                                              | PPT                                 |
| CS24025        | T-FGC635E                  | <i>HAG1</i>         | 77.5/Ws: 60.6                          | 311                                  | 66.7/Ws: 67.6                                    | 240                               | 82.8/Ws: 73.4                                          | 346                                                              | PPT                                 |
| CS30858        | TFGC412A                   | <i>HAG2</i>         | 61.2/Ws: 73.0                          | 322                                  | 58.1/Ws: 72.7                                    | 358                               | 56.3/Ws: 62.2                                          | 279                                                              | HPT                                 |
| CS30862        | TFGC412E                   | <i>HAG2</i>         | 62.0/Ws: 73.0                          | 347                                  | 60.1/Ws: 72.7                                    | 311                               | 38.1/Ws: 62.2                                          | 323                                                              | HPT                                 |
| CS30907        | TFGC412B                   | <i>HAG2</i>         | 40.6/Ws: 65.1                          | 303                                  | 57.8/Ws: 62.0                                    | 346                               | 38.8/Ws:57.8                                           | 266                                                              | HPT                                 |
| CS30908        | TFGC412C                   | <i>HAG2</i>         | 41.5/Ws: 63.6                          | 118                                  |                                                  |                                   | 67.0/Ws: 99.2                                          | 253                                                              | HPT                                 |
| CS30909        | TFGC412D                   | <i>HAG2</i>         | 66.8/Ws: 63.6                          | 241                                  |                                                  |                                   | 56.3/Ws: 99.2                                          | 300                                                              | HPT                                 |
| <b>CS3981</b>  | <b>TFGC156A</b>            | <b><i>HAG3</i></b>  | <b>1.60/Ws: 53.1</b>                   | <b>207</b>                           | <b>9.41/Ws: 79.0</b>                             | <b>179</b>                        | <b>61.0/Ws: 81.4</b>                                   | <b>408</b>                                                       | <b>HPT</b>                          |
| <b>CS3982</b>  | <b>TFGC156B</b>            | <b><i>HAG3</i></b>  | <b>3.90/Ws: 55.5</b>                   | <b>423</b>                           | <b>6.97/Ws: 79.0</b>                             | <b>201</b>                        | <b>59.1/Ws: 81.4</b>                                   | <b>557</b>                                                       | <b>HPT</b>                          |
| CS24026        | T-FGC413A                  | <i>HAG4</i>         | 59.2/Ws: 69.6                          | 299                                  | 62.8/Ws: 79.0                                    | 347                               | 68.9/Ws: 81.4                                          | 373                                                              | HYG                                 |
| CS30863        | TFGC623A                   | <i>HAG5</i>         | 56.6/Ws: 81.4                          | 274                                  | 72.1/Ws: 80.4                                    | 333                               | 86.2/Ws: 90.4                                          | 390                                                              | PPT                                 |
| CS30864        | TFGC623B                   | <i>HAG5</i>         | 72.0/Ws: 81.4                          | 379                                  | 71.5/Ws: 80.4                                    | 369                               | 86.8/Ws: 90.4                                          | 364                                                              | PPT                                 |
| CS30865        | TFGC623C                   | <i>HAG5</i>         | 60.5/Ws: 81.4                          | 385                                  | 69.4/Ws: 80.4                                    | 389                               | 83.4/Ws: 90.4                                          | 374                                                              | PPT                                 |
| CS30910        | TFGC623D                   | <i>HAG5</i>         | 66.1/Ws: 77.9                          | 248                                  | 55.3/Ws: 43.1                                    | 246                               | 99.7/Ws: 55.7                                          | 287                                                              | PPT                                 |
|                | T-FGC703Am                 | <i>HDA14</i>        | 78.8/Ws: 86.3                          | 345                                  | 79.2/Ws: 75.8                                    | 298                               | 66.8/Ws: 72.7                                          | 268                                                              | PPT                                 |
|                | T-FGC703B                  | <i>HDA14</i>        | 88.8/Ws: 86.3                          | 349                                  | 78.8/Ws: 75.8                                    | 372                               | 71.0/Ws: 72.7                                          | 404                                                              | PPT                                 |
|                | T-FGC703C                  | <i>HDA14</i>        | 82.9/Ws: 86.3                          | 351                                  | 73.5/Ws: 75.8                                    | 268                               | 67.3/Ws: 72.7                                          | 342                                                              | PPT                                 |
|                | T-FGC703D                  | <i>HDA14</i>        | 79.4/Ws: 86.3                          | 360                                  | 77.4/Ws: 75.8                                    | 469                               | 69.8/Ws: 72.7                                          | 368                                                              | PPT                                 |
| <b>CS30922</b> | <b>TFGC632A</b>            | <b><i>HDA15</i></b> | <b>22.6/Ws: 81.9</b>                   | <b>296</b>                           | <b>53.4/Ws: 66.1</b>                             | <b>219</b>                        | <b>85.5/Ws:87.4</b>                                    | <b>328</b>                                                       | <b>PPT</b>                          |
| <b>CS30923</b> | <b>TFGC632B</b>            | <b><i>HDA15</i></b> | <b>30.3/Ws: 81.9</b>                   | <b>439</b>                           | <b>60.8/Ws: 66.1</b>                             | <b>372</b>                        | <b>89.9/Ws:87.4</b>                                    | <b>385</b>                                                       | <b>PPT</b>                          |
| <b>CS30924</b> | <b>TFGC632C</b>            | <b><i>HDA15</i></b> | <b>36.4/Ws: 81.9</b>                   | <b>396</b>                           | <b>69.2/Ws: 66.4</b>                             | <b>292</b>                        | <b>90.4/Ws:87.4</b>                                    | <b>396</b>                                                       | <b>PPT</b>                          |
| <b>CS30925</b> | <b>TFGC664A</b>            | <b><i>HDA19</i></b> | <b>28.5/Ws: 81.9</b>                   | <b>438</b>                           | <b>63.2/Ws: 81.5</b>                             | <b>456</b>                        | <b>80.3/Ws:87.4</b>                                    | <b>401</b>                                                       | <b>PPT</b>                          |
| <b>CS30926</b> | <b>TFGC664B</b>            | <b><i>HDA19</i></b> | <b>39.1/Ws: 81.9</b>                   | <b>479</b>                           | <b>52.9/Ws: 66.4</b>                             | <b>240</b>                        | <b>68.8/Ws:87.4</b>                                    | <b>237</b>                                                       | <b>PPT</b>                          |

| ABRC stock no. | Univ. of Arizona stock no. | Gene symbol | Tumorigenesis* (A208) mutant/wild-type | No. of root segments assayed: tumors | Transient GUS activity* (At849) mutant/wild-type | No. of root segments assayed: GUS | Ppt or Kan-resistance* (At872 or 849) mutant/wild-type | No. of root segments assayed: Ppt <sup>r</sup> /Kan <sup>r</sup> | Resistance of the line <sup>†</sup> |
|----------------|----------------------------|-------------|----------------------------------------|--------------------------------------|--------------------------------------------------|-----------------------------------|--------------------------------------------------------|------------------------------------------------------------------|-------------------------------------|
| CS3977         | TFGC427A                   | <i>HDA2</i> | 13.2/Ws: 24.2                          |                                      |                                                  |                                   |                                                        |                                                                  | HPT                                 |
| CS3988         | TFGC427B                   | <i>HDA2</i> | 36.9/Ws: 24.2                          |                                      |                                                  |                                   |                                                        |                                                                  | HPT                                 |
| CS30876        | TFGC456A                   | <i>HDA5</i> | 32.5/Ws: 57.7                          | 400                                  | 45.9/Ws: 46.6                                    | 327                               | 46.6/Ws: 59.0                                          | 354                                                              | HPT                                 |
|                | T-FGC886A                  | <i>HDA5</i> | 84.7/Ws: 86.3                          | 399                                  | 88.9/Ws: 75.8                                    | 314                               | 74.9/Ws: 72.7                                          | 337                                                              | PPT                                 |
| CS24038        | T-FGC451A                  | <i>HDA6</i> | 77.6/Ws: 81.2                          | 401                                  | 94.7/Ws: 84.8                                    | 542                               | 63.2/Ws: 65.5                                          | 334                                                              | HPT                                 |
| CS24039        | T-FGC451B                  | <i>HDA6</i> | 75.1/Ws: 81.2                          | 394                                  | 77.6/Ws: 84.8                                    | 638                               | 56.8/Ws: 65.5                                          | 315                                                              | HPT                                 |
|                | T-FGC451C                  | <i>HDA6</i> | 76.9/Ws: 69.6                          | 445                                  | 77.3/Ws: 79.0                                    | 331                               | 74.1/Ws: 81.4                                          | 432                                                              | HYG                                 |
| CS30953        | TFGC654A                   | <i>HDA8</i> | 30.3/Ws: 58.1                          | 241                                  | 53.3/Ws: 66.1                                    | 214                               | 51.8/Ws: 68.9                                          | 226                                                              | PPT                                 |
| CS30954        | TFGC654B                   | <i>HDA8</i> | 59.2/Ws: 70.2                          | 233                                  | 58.1/Ws: 77.8                                    | 186                               | 83.8/Ws: 73.1                                          | 278                                                              | PPT                                 |
| CS30955        | TFGC654C                   | <i>HDA8</i> | 53.1/Ws: 50.4                          | 277                                  |                                                  |                                   | 45.8/Ws: 49.2                                          | 345                                                              | PPT                                 |
| CS30878        | TFGC459A                   | <i>HDA9</i> | 75.9/Ws: 84.2                          | 266                                  | 15.9/Ws: 48.4                                    | 246                               | 84.4/Ws: 89.3                                          | 310                                                              | HPT                                 |
| CS30879        | TFGC459B                   | <i>HDA9</i> | 81.0/Ws: 84.2                          | 279                                  | 21.6/Ws: 48.4                                    | 246                               | 90.0/Ws: 89.3                                          | 320                                                              | HPT                                 |
| CS3969         | TFGC155A                   | <i>HDT1</i> | 54.9/Ws: 78.4                          | 458                                  | 58.4/Ws: 81.5                                    | 418                               | 57.8/Ws: 51.6                                          | 339                                                              | HPT                                 |
| CS3970         | TFGC155B                   | <i>HDT1</i> | 53.0/Ws: 78.6                          | 374                                  | 67.5/Ws: 81.5                                    | 305                               | 36.3/Ws: 51.6                                          | 278                                                              | HPT                                 |
| CS30871        | TFGC526A                   | <i>HDT2</i> | 23.5/Ws: 77.3                          | 508                                  | 33.8/Ws: 78.1                                    | 681                               | 25.3/Ws: 60.4                                          | 487                                                              | HPT                                 |
| CS30872        | TFGC526B                   | <i>HDT2</i> | 14.7/Ws: 74.3                          | 738                                  | 42.8/Ws: 77.8                                    | 862                               | 30.6/Ws: 60.3                                          | 579                                                              | HPT                                 |
| CS30873        | TFGC526C                   | <i>HDT2</i> | 18.4/Ws: 75.2                          | 637                                  | 43.3/Ws: 78.2                                    | 829                               | 28.6/Ws: 63.0                                          | 510                                                              | HPT                                 |
| CS30874        | TFGC526D                   | <i>HDT2</i> | 20.7/Ws: 75.4                          | 763                                  | 33.6/Ws: 70.3                                    | 1039                              | 22.4/Ws: 64.6                                          | 550                                                              | HPT                                 |
| CS30875        | TFGC526E                   | <i>HDT2</i> | 16.7/Ws: 74.9                          | 777                                  | 32.4/Ws: 71.2                                    | 996                               | 25.1/Ws: 68.7                                          | 492                                                              | HPT                                 |
| CS24027        | T-FGC659A                  | <i>HDT3</i> | 39.4/Ws: 60.6                          | 284                                  | 63.2/Ws: 67.6                                    | 220                               | 70.6/Ws: 73.4                                          | 289                                                              | PPT                                 |
| CS24028        | T-FGC659Bm                 | <i>HDT3</i> | 62.2/Ws: 51.7                          | 325                                  | 37.7/Ws: 67.1                                    | 268                               | 69.2/Ws: 84.6                                          | 357                                                              | PPT                                 |
| CS24029        | T-FGC659C                  | <i>HDT3</i> | 52.1/Ws: 51.7                          | 342                                  | 49.6/Ws: 67.1                                    | 351                               | 67.9/Ws: 84.6                                          | 442                                                              | PPT                                 |
| CS30956        | TFGC631A                   | <i>HDT4</i> | 50.0/Ws: 70.2                          | 244                                  | 78.8/Ws: 77.8                                    | 160                               | 83.1/Ws: 73.1                                          | 156                                                              | PPT                                 |
| CS30957        | TFGC631B                   | <i>HDT4</i> | 57.4/Ws: 65.1                          | 282                                  | 44.5/Ws: 62.0                                    | 218                               | 79.1/Ws: 57.8                                          | 230                                                              | PPT                                 |
| CS30958        | TFGC631C                   | <i>HDT4</i> | 68.2/Ws: 65.1                          | 343                                  | 37.5/Ws: 62.0                                    | 224                               | 79.3/Ws: 57.8                                          | 352                                                              | PPT                                 |
| CS23979        | T-FGC993A                  | <i>HON1</i> | 49.2/Ws: 60.4                          | 238                                  | 85.8/Ws: 76.0                                    | 344                               | 71.6/Ws: 78.2                                          | 215                                                              | PPT                                 |
| CS23980        | T-FGC993B                  | <i>HON1</i> | 44.1/Ws: 60.4                          | 281                                  | 80.8/Ws: 76.0                                    | 260                               | 57.0/Ws: 78.2                                          | 244                                                              | PPT                                 |
| CS23981        | T-FGC993Cm                 | <i>HON1</i> | 52.4/Ws: 60.4                          | 248                                  | 68.9/Ws: 76.0                                    | 370                               | 60.4/Ws: 78.2                                          | 250                                                              | PPT                                 |
|                | T-FGC991Dm                 | <i>HON5</i> | 54.7/Ws: 72.3                          | 245                                  | 48.7/Ws: 71.8                                    | 308                               | 54.4/Ws: 70.6                                          | 270                                                              | PPT                                 |
| CS23982        | T-FGC991A                  | <i>HON5</i> | 44.7/Ws: 60.4                          | 273                                  | 78.9/Ws: 76.0                                    | 289                               | 56.9/Ws: 78.2                                          | 292                                                              | PPT                                 |
|                | T-FGC991C                  | <i>HON5</i> | 29.4/Ws: 69.1                          | 238                                  | 27.1/Ws: 74.8                                    | 214                               | 55.5/Ws: 69.3                                          | 200                                                              | PPT                                 |
| CS23983        | T-FGC991B                  | <i>HON5</i> | 59.6/Ws: 60.4                          | 245                                  | 89.4/Ws: 76.0                                    | 293                               | 71.0/Ws: 78.2                                          | 248                                                              | PPT                                 |
| CS3984         | TFGC458A                   | <i>HXA1</i> | 29.2/Ws: 24.2                          |                                      |                                                  |                                   |                                                        |                                                                  | HPT                                 |
| CS3986         | TFGC458C                   | <i>HXA1</i> | 24.8/Ws: 24.2                          |                                      |                                                  |                                   |                                                        |                                                                  | HPT                                 |
| CS30989        | T-FGC458D                  | <i>HXA1</i> | 69.7/Ws: 81.2                          | 284                                  | 63.3/Ws: 84.8                                    | 338                               | 80.1/Ws: 65.5                                          | 322                                                              | HPT                                 |
| CS30990        | T-FGC458E                  | <i>HXA1</i> | 72.8/Ws: 81.2                          | 316                                  | 71.8/Ws: 84.8                                    | 266                               | 68.7/Ws: 65.5                                          | 233                                                              | HPT                                 |

| ABRC stock no. | Univ. of Arizona stock no. | Gene symbol  | Tumorigenesis* (A208) mutant/wild-type | No. of root segments assayed: tumors | Transient GUS activity* (At849) mutant/wild-type | No. of root segments assayed: GUS | Ppt or Kan-resistance* (At872 or 849) mutant/wild-type | No. of root segments assayed: Ppt <sup>r</sup> /Kan <sup>r</sup> | Resistance of the line <sup>†</sup> |
|----------------|----------------------------|--------------|----------------------------------------|--------------------------------------|--------------------------------------------------|-----------------------------------|--------------------------------------------------------|------------------------------------------------------------------|-------------------------------------|
| CS30991        | T-FGC458F                  | <i>HXA1</i>  | 60.7/Ws: 81.2                          | 303                                  | 72.2/Ws: 84.8                                    | 309                               | 75.8/Ws: 65.5                                          | 227                                                              | HPT                                 |
| CS30992        | T-FGC458G                  | <i>HXA1</i>  | 73.1/Ws: 81.2                          | 197                                  | 75.7/Ws: 84.8                                    | 251                               | 85.7/Ws: 65.5                                          | 252                                                              | HPT                                 |
| CS30880        | TFGC296A                   | <i>HXA2</i>  | 68.4/Ws: 41.1                          | 237                                  | 66.8/Ws: 45.4                                    | 587                               | 57.1/Ws:42.9                                           | 326                                                              | HPT                                 |
| CS30881        | TFGC296B                   | <i>HXA2</i>  | 62.9/Ws: 41.1                          | 294                                  | 68.6/Ws: 45.4                                    | 420                               | 45.0/Ws:42.9                                           | 258                                                              | HPT                                 |
| CS23984        | T-FGC947Am                 | <i>MBD1</i>  | 46.0/Ws: 60.4                          | 224                                  | 73.2/Ws: 76.0                                    | 291                               | 59.2/Ws: 78.2                                          | 223                                                              | PPT                                 |
| CS23911        | T-FGC988Bm                 | <i>MBD10</i> | 45.2/Ws: 60.4                          | 197                                  | 84.2/Ws: 76.0                                    | 335                               | 43.0/Ws: 78.2                                          | 251                                                              | PPT                                 |
| CS23990        | T-FGC988A                  | <i>MBD10</i> | 48.6/Ws: 60.4                          | 173                                  | 58.3/Ws: 76.0                                    | 294                               | 28.2/Ws: 78.2                                          | 199                                                              | PPT                                 |
| CS23992        | T-FGC989Am                 | <i>MBD11</i> | 38.0/Ws: 60.4                          | 221                                  | 23.7/Ws: 76.0                                    | 336                               | 44.6/Ws: 78.2                                          | 240                                                              | PPT                                 |
| CS23993        | T-FGC989B                  | <i>MBD11</i> | 62.3/Ws: 60.4                          | 268                                  | 87.4/Ws: 76.0                                    | 277                               | 59.2/Ws: 78.2                                          | 294                                                              | PPT                                 |
| CS30911        | TFGC648A                   | <i>MBD2</i>  | 37.1/Ws: 63.6                          | 307                                  |                                                  |                                   | 99.7/Ws: 99.2                                          | 287                                                              | PPT                                 |
| CS30913        | TFGC693A                   | <i>MBD2</i>  | 49.0/Ws: 83.4                          | 194                                  | 24.6/Ws: 23.5                                    | 364                               | 49.4/Ws:58.3                                           | 312                                                              | PPT                                 |
| CS23985        | T-FGC648Cm                 | <i>MBD2</i>  | 75.2/Ws: 86.3                          | 311                                  | 87.0/Ws: 75.8                                    | 376                               | 81.6/Ws: 72.7                                          | 245                                                              | PPT                                 |
| CS30912        | T-FGC648B                  | <i>MBD2</i>  | 65.4/Ws: 60.6                          | 387                                  | 81.8/Ws: 67.6                                    | 335                               | 75.3/Ws: 73.4                                          | 360                                                              | PPT                                 |
| CS23986        | T-FGC704A                  | <i>MBD7</i>  | 85.8/Ws: 90.2                          | 296                                  | 84.1/Ws: 72.8                                    | 477                               | 85.1/Ws: 73.0                                          | 329                                                              | PPT                                 |
| CS23987        | T-FGC704B                  | <i>MBD7</i>  | 86.1/Ws: 90.2                          | 251                                  | 81.3/Ws: 72.8                                    | 73.0                              | 73.0/Ws: 73.0                                          | 252                                                              | PPT                                 |
| CS23988        | T-FGC704C                  | <i>MBD7</i>  | 56.2/Ws: 60.4                          | 265                                  | 78.3/Ws: 76.0                                    | 374                               | 40.1/Ws: 78.2                                          | 252                                                              | PPT                                 |
| CS30993        | T-FGC695A                  | <i>MBD8</i>  | 85.4/Ws: 90.2                          | 288                                  | 82.4/Ws: 72.8                                    | 471                               | 78.6/Ws: 73.0                                          | 257                                                              | PPT                                 |
| CS23989        | T-FGC695B                  | <i>MBD8</i>  | 82.0/Ws: 90.2                          | 372                                  | 78.6/Ws: 72.8                                    | 289                               | 71.0/Ws: 73.0                                          | 469                                                              | PPT                                 |
|                | T-FGC695D                  | <i>MBD8</i>  | 55.6/Ws: 72.3                          | 275                                  | 35.7/Ws: 71.8                                    | 286                               | 49.6/Ws: 70.6                                          | 268                                                              | PPT                                 |
|                | T-FGC695E                  | <i>MBD8</i>  | 63.4/Ws: 60.1                          | 328                                  | 36.1/Ws: 65.1                                    | 255                               | 43.9/Ws: 58.1                                          | 305                                                              | PPT                                 |
| CS30882        | TFGC450A                   | <i>MFP1</i>  | 33.5/Ws: 41.1                          | 343                                  | 46.6/Ws: 45.4                                    | 279                               | 31.4/Ws:42.9                                           | 280                                                              | HPT                                 |
| CS30947        | TFGC450D                   | <i>MFP1</i>  | 33.8/Ws: 58.1                          | 284                                  | 56.2/Ws: 66.1                                    | 233                               | 34.4/Ws:68.9                                           | 224                                                              | HPT                                 |
| CS30948        | TFGC450E                   | <i>MFP1</i>  | 32.9/Ws: 41.1                          | 283                                  | 50.4/Ws: 45.4                                    | 288                               | 32.5/Ws:42.9                                           | 286                                                              | HPT                                 |
| CS30949        | TFGC450F                   | <i>MFP1</i>  | 57.8/Ws: 65.1                          | 282                                  | 42.1/Ws: 62.0                                    | 304                               | 18.7/Ws:57.8                                           | 282                                                              | HPT                                 |
| CS30950        | TFGC450G                   | <i>MFP1</i>  | 43.7/Ws: 58.1                          | 295                                  | 76.3/Ws: 66.1                                    | 295                               | 44.5/Ws:68.9                                           | 382                                                              | HPT                                 |
| CS30994        | T-FGC441Bm                 | <i>NFA1</i>  | 62.7/Ws: 67.2                          | 359                                  | 52.9/Ws: 70.9                                    | 548                               | 82.3/Ws: 79.8                                          | 356                                                              | HPT                                 |
| CS30995        | T-FGC441A                  | <i>NFA1</i>  | 61.2/Ws: 67.2                          | 438                                  | 44.4/Ws: 70.9                                    | 522                               | 84.4/Ws: 79.8                                          | 371                                                              | HPT                                 |
| CS30996        | T-FGC441Cm                 | <i>NFA1</i>  | 54.6/Ws: 67.2                          | 205                                  | 58.1/Ws: 70.9                                    | 382                               | 79.6/Ws: 79.8                                          | 367                                                              | HPT                                 |
| CS30915        | TFGC442D                   | <i>NFA2</i>  | 44.5/Ws: 77.9                          | 213                                  | 46.3/Ws: 43.1                                    | 270                               | 59.1/Ws: 55.7                                          | 443                                                              | HPT                                 |
| <b>CS3991</b>  | <b>TFGC300A</b>            | <b>NFA2</b>  | <b>13.2/Ws: 35.7</b>                   |                                      |                                                  |                                   |                                                        |                                                                  | <b>HPT</b>                          |
| <b>CS3989</b>  | <b>TFGC442A</b>            | <b>NFA2</b>  | <b>13.2/Ws: 24.2</b>                   |                                      |                                                  |                                   |                                                        |                                                                  | <b>HPT</b>                          |
| <b>CS30887</b> | <b>TFGC447A</b>            | <b>NFA3</b>  | <b>33.0/Ws: 87.3</b>                   | <b>364</b>                           | <b>75.6/Ws: 88.6</b>                             | <b>445</b>                        | <b>65.0/Ws: 81.0</b>                                   | <b>448</b>                                                       | <b>HPT</b>                          |
| CS30888        | TFGC447B                   | <i>NFA3</i>  | 55.3/Ws: 77.1                          | 614                                  | 39.5/Ws: 73.8                                    | 857                               | 82.1/Ws: 81.0                                          | 363                                                              | HPT                                 |
| CS30959        | TFGC630A                   | <i>NFA4</i>  | 28.0/Ws: 65.1                          | 207                                  | 48.1/Ws: 62.0                                    | 212                               | 73.5/Ws:57.8                                           | 215                                                              | PPT                                 |
| CS30960        | TFGC630B                   | <i>NFA4</i>  | 62.7/Ws: 70.2                          | 225                                  | 68.9/Ws: 77.8                                    | 183                               | 74.1/Ws:73.1                                           | 213                                                              | PPT                                 |
| CS30961        | TFGC630C                   | <i>NFA4</i>  | 56.7/Ws: 70.2                          | 187                                  | 64.8/Ws: 77.8                                    | 122                               | 83.6/Ws:73.1                                           | 177                                                              | PPT                                 |

| ABRC stock no. | Univ. of Arizona stock no. | Gene symbol  | Tumorigenesis* (A208) mutant/wild-type | No. of root segments assayed: tumors | Transient GUS activity* (At849) mutant/wild-type | No. of root segments assayed: GUS | Ppt or Kan-resistance* (At872 or 849) mutant/wild-type | No. of root segments assayed: Ppt <sup>r</sup> /Kan <sup>r</sup> | Resistance of the line <sup>†</sup> |
|----------------|----------------------------|--------------|----------------------------------------|--------------------------------------|--------------------------------------------------|-----------------------------------|--------------------------------------------------------|------------------------------------------------------------------|-------------------------------------|
| CS30962        | TFGC630D                   | <i>NFA4</i>  | 79.1/Ws: 70.2                          | 211                                  | 76.3/Ws: 77.8                                    | 198                               | 76.5/Ws:73.1                                           | 295                                                              | PPT                                 |
| CS24041        | T-FGC768C                  | <i>NFA6</i>  | 90.1/Ws: 90.2                          | 191                                  | 84.1/Ws: 72.8                                    | 250                               | 76.3/Ws: 73.0                                          | 169                                                              | PPT                                 |
| CS24042        | T-FGC768D                  | <i>NFA6</i>  | 79.8/Ws: 86.2                          | 332                                  | 86.7/Ws: 92.6                                    | 414                               | 74.1/Ws: 83.0                                          | 428                                                              | PPT                                 |
| CS23994        | T-FGC768Am                 | <i>NFA6</i>  | 79.5/Ws: 90.2                          | 200                                  | 85.0/Ws: 72.8                                    | 479                               | 81.4/Ws: 73.0                                          | 172                                                              | PPT                                 |
| CS23995        | T-FGC768Bm                 | <i>NFA6</i>  | 87.1/Ws: 86.2                          | 279                                  | 88.2/Ws: 92.6                                    | 459                               | 67.3/Ws: 83.0                                          | 309                                                              | PPT                                 |
| CS30916        | TFGC446A                   | <i>NFB1</i>  | 62.2/Ws: 83.4                          | 222                                  | 10.7/Ws: 23.5                                    | 302                               | 45.4/Ws: 58.3                                          | 227                                                              | HPT                                 |
| CS30917        | TFGC446B                   | <i>NFB1</i>  | 66.8/Ws: 76.9                          | 229                                  | 87.0/Ws: 81.5                                    | 123                               | 50.4/Ws: 51.6                                          | 143                                                              | HPT                                 |
| CS30918        | TFGC446C                   | <i>NFB1</i>  | 63.9/Ws: 83.4                          | 313                                  | 17.4/Ws: 23.5                                    | 295                               | 55.8/Ws: 58.3                                          | 206                                                              | HPT                                 |
| CS30919        | TFGC446D                   | <i>NFB1</i>  | 56.8/Ws: 77.9                          | 273                                  | 46.3/Ws: 43.1                                    | 219                               | 52.8/Ws: 55.7                                          | 287                                                              | HPT                                 |
|                | T-FGC811B                  | <i>NFC1</i>  | 77.2/Ws: 86.2                          | 276                                  | 85.3/Ws: 92.6                                    | 476                               | 69.7/Ws: 83.0                                          | 446                                                              | PPT                                 |
| CS30889        | TFGC655A                   | <i>NFC2</i>  | 57.1/Ws: 79.8                          | 424                                  | 63.8/Ws: 65.5                                    | 326                               | 76.8/Ws:87.4                                           | 323                                                              | PPT                                 |
| CS30890        | TFGC655B                   | <i>NFC2</i>  | 57.4/Ws: 69.9                          | 248                                  | 43.5/Ws: 54.8                                    | 46                                |                                                        |                                                                  | PPT                                 |
| CS3992         | TFGC463A                   | <i>NFC4</i>  | 29.7/Ws: 35.7                          |                                      |                                                  |                                   |                                                        |                                                                  | HPT                                 |
| CS3994         | TFGC463C                   | <i>NFC4</i>  | 38.6/Ws: 35.7                          |                                      |                                                  |                                   |                                                        |                                                                  | HPT                                 |
| CS30999        | T-FGC490B                  | <i>NFD1</i>  | 85.4/Ws: 67.2                          | 171                                  | 64.2/Ws: 70.9                                    | 162                               | 66.9/Ws: 79.8                                          | 166                                                              | HPT                                 |
| CS30997        | T-FGC490Cm                 | <i>NFD1</i>  | 70.7/Ws: 67.2                          | 157                                  | 66.7/Ws: 70.9                                    | 144                               | 81.8/Ws: 79.8                                          | 137                                                              | HPT                                 |
| CS30998        | T-FGC490A                  | <i>NFD1</i>  | 75.9/Ws: 67.2                          | 324                                  | 71.6/Ws: 70.9                                    | 236                               | 79.9/Ws: 79.8                                          | 239                                                              | HPT                                 |
| CS24043        | T-FGC962Am                 | <i>NFD10</i> | 69.7/Ws: 69.9                          | 290                                  | 55.1/Ws: 66.3                                    | 448                               | 71.8/Ws: 67.6                                          | 245                                                              | PPT                                 |
| CS24044        | T-FGC962B                  | <i>NFD10</i> | 58.5/Ws: 69.9                          | 352                                  | 55.3/Ws: 66.3                                    | 332                               | 72.3/Ws: 67.6                                          | 394                                                              | PPT                                 |
| CS24045        | T-FGC962C                  | <i>NFD10</i> | 79.9/Ws: 69.9                          | 313                                  | 58.9/Ws: 66.3                                    | 297                               | 73.4/Ws: 67.6                                          | 316                                                              | PPT                                 |
| CS31000        | T-FGC448C                  | <i>NFD2</i>  | 80.8/Ws: 67.2                          | 172                                  | 70.4/Ws: 70.9                                    | 213                               | 71.8/Ws: 79.8                                          | 209                                                              | HPT                                 |
| CS23944        | T-FGC448D                  | <i>NFD2</i>  | 60.5/Ws: 67.2                          | 86                                   | 67.1/Ws: 70.9                                    | 167                               | 79.4/Ws: 79.8                                          | 126                                                              | HPT                                 |
| CS30893        | TFGC460A                   | <i>NFD3</i>  | 57.4/Ws: 64.5                          | 230                                  | 60.4/Ws: 54.8                                    | 219                               | 38.4/Ws: 73.5                                          | 73                                                               | HPT                                 |
| CS30894        | TFGC460B                   | <i>NFD3</i>  | 55.3/Ws: 81.3                          | 132                                  | 13.3/Ws: 44.2                                    | 204                               | 33.6/Ws: 73.5                                          | 116                                                              | HPT                                 |
| CS30895        | TFGC460C                   | <i>NFD3</i>  | 77.8/Ws: 87.3                          | 351                                  | 76.7/Ws: 88.6                                    | 442                               | 75.8/Ws: 81.0                                          | 326                                                              | HPT                                 |
| CS23997        | T-FGC676A                  | <i>NFD4</i>  | 47.6/Ws: 60.4                          | 187                                  | 63.7/Ws: 76.0                                    | 226                               | 47.0/Ws: 78.2                                          | 217                                                              | PPT                                 |
| CS30963        | TFGC620A                   | <i>NFD5</i>  | 58.1/Ws: 70.2                          | 203                                  | 70.2/Ws: 77.8                                    | 205                               | 68.3/Ws:73.1                                           | 180                                                              | PPT                                 |
| CS30964        | TFGC620B                   | <i>NFD5</i>  | 55.1/Ws: 70.2                          | 247                                  | 75.8/Ws: 77.8                                    | 211                               | 86.2/Ws:73.1                                           | 247                                                              | PPT                                 |
| CS30965        | TFGC620C                   | <i>NFD5</i>  | 72.8/Ws: 70.2                          | 294                                  | 80.1/Ws: 77.8                                    | 326                               | 74.8/Ws:73.1                                           | 357                                                              | PPT                                 |
|                | T-FGC960A                  | <i>NFD6</i>  | 47.1/Ws: 72.3                          | 208                                  | 62.3/Ws: 71.8                                    | 244                               | 58.9/Ws: 70.6                                          | 207                                                              | PPT                                 |
|                | T-FGC960Bm                 | <i>NFD6</i>  | 69.1/Ws: 72.3                          | 301                                  | 87.5/Ws: 71.8                                    | 360                               | 73.6/Ws: 70.6                                          | 344                                                              | PPT                                 |
|                | T-FGC960C                  | <i>NFD6</i>  | 64.0/Ws: 72.3                          | 228                                  | 75.3/Ws: 71.8                                    | 299                               | 65.8/Ws: 70.6                                          | 275                                                              | PPT                                 |
|                | T-FGC960D                  | <i>NFD6</i>  | 68.0/Ws: 72.3                          | 194                                  | 36.5/Ws: 71.8                                    | 255                               | 79.6/Ws: 70.6                                          | 201                                                              | PPT                                 |
| CS23945        | T-FGC961A                  | <i>NFD7</i>  | 81.2/Ws: 86.2                          | 335                                  | 90.6/Ws: 92.6                                    | 341                               | 68.2/Ws: 83.0                                          | 289                                                              | PPT                                 |
| CS23946        | T-FGC961B                  | <i>NFD7</i>  | 85.5/Ws: 90.2                          | 221                                  | 86.0/Ws: 72.8                                    | 499                               | 82.0/Ws: 73.0                                          | 183                                                              | PPT                                 |
|                | T-FGC961D                  | <i>NFD7</i>  | 71.5/Ws: 86.2                          | 333                                  | 85.7/Ws: 92.6                                    | 412                               | 63.7/Ws: 83.0                                          | 358                                                              | PPT                                 |



| ABRC stock no. | Univ. of Arizona stock no. | Gene symbol         | Tumorigenesis* (A208) mutant/wild-type | No. of root segments assayed: tumors | Transient GUS activity* (At849) mutant/wild-type | No. of root segments assayed: GUS | Ppt or Kan-resistance* (At872 or 849) mutant/wild-type | No. of root segments assayed: Ppt <sup>r</sup> /Kan <sup>r</sup> | Resistance of the line <sup>†</sup> |
|----------------|----------------------------|---------------------|----------------------------------------|--------------------------------------|--------------------------------------------------|-----------------------------------|--------------------------------------------------------|------------------------------------------------------------------|-------------------------------------|
| CS23947        | T-FGC961C                  | <i>NFD7</i>         | 86.9/Ws: 86.2                          | 350                                  | 85.0/Ws: 92.6                                    | 366                               | 65.7/Ws: 83.0                                          | 425                                                              | PPT                                 |
|                | T-FGC782A                  | <i>SDG1</i>         | 45.3/Ws: 69.1                          | 257                                  | 39.6/Ws: 74.8                                    | 273                               | 57.8/Ws: 69.3                                          | 275                                                              | PPT                                 |
|                | T-FGC782B                  | <i>SDG1</i>         | 48.0/Ws: 69.1                          | 225                                  | 42.1/Ws: 74.8                                    | 316                               | 52.1/Ws: 69.3                                          | 217                                                              | PPT                                 |
|                | <b>T-FGC782C</b>           | <b><i>SDG1</i></b>  | <b>13.3/Ws: 69.1</b>                   | <b>315</b>                           | <b>42.8/Ws: 74.8</b>                             | <b>276</b>                        | <b>44.3/Ws: 69.3</b>                                   | <b>325</b>                                                       | <b>PPT</b>                          |
|                | T-FGC782D                  | <i>SDG1</i>         | 43.8/Ws: 69.1                          | 299                                  | 49.8/Ws: 74.8                                    | 289                               | 46.9/Ws: 69.3                                          | 254                                                              | PPT                                 |
|                | T-FGC787C                  | <i>SDG10</i>        | 31.8/Ws: 72.2                          | 179                                  | 42.3/Ws: 59.3                                    | 187                               | 38.1/Ws: 60.0                                          | 194                                                              | PPT                                 |
| CS23952        | T-FGC787Bm                 | <i>SDG10</i>        | 46.7/Ws: 72.2                          | 274                                  | 35.4/Ws: 59.3                                    | 257                               | 49.0/Ws: 60.0                                          | 339                                                              | PPT                                 |
| CS23953        | T-FGC787A                  | <i>SDG10</i>        | 54.2/Ws: 72.2                          | 299                                  | 29.9/Ws: 59.3                                    | 318                               | 49.1/Ws: 60.0                                          | 328                                                              | PPT                                 |
|                | T-FGC805B                  | <i>SDG11</i>        | 51.2/Ws: 69.9                          | 254                                  | 53.8/Ws: 66.3                                    | 184                               | 68.9/Ws: 67.6                                          | 225                                                              | PPT                                 |
| CS23954        | T-FGC805Am                 | <i>SDG11</i>        | 37.8/Ws: 72.2                          | 267                                  | 34.7/Ws: 59.3                                    | 251                               | 32.6/Ws: 60.0                                          | 255                                                              | PPT                                 |
|                | T-FGC805Cm                 | <i>SDG11</i>        | 58.3/Ws: 69.1                          | 228                                  | 81.6/Ws: 74.8                                    | 304                               | 56.2/Ws: 69.3                                          | 331                                                              | PPT                                 |
|                | T-FGC805D                  | <i>SDG11</i>        | 52.1/Ws: 69.1                          | 307                                  | 61.4/Ws: 74.8                                    | 373                               | 55.8/Ws: 69.3                                          | 267                                                              | PPT                                 |
| <b>CS23955</b> | <b>T-FGC823A</b>           | <b><i>SDG15</i></b> | <b>11.9/Ws: 72.2</b>                   | <b>236</b>                           | <b>35.2/Ws: 59.3</b>                             | <b>239</b>                        | <b>37.1/Ws: 60.0</b>                                   | <b>261</b>                                                       | <b>PPT</b>                          |
| CS23999        | T-FGC826A                  | <i>SDG17</i>        | 59.7/Ws: 60.4                          | 276                                  | 75.9/Ws: 76.0                                    | 320                               | 41.3/Ws: 78.2                                          | 252                                                              | PPT                                 |
| CS24000        | T-FGC807Am                 | <i>SDG19</i>        | 60.3/Ws: 60.4                          | 209                                  | 72.0/Ws: 76.0                                    | 407                               | 56.0/Ws: 78.2                                          | 243                                                              | PPT                                 |
|                | T-FGC784D                  | <i>SDG2</i>         | 50.4/Ws: 69.1                          | 238                                  | 32.4/Ws: 74.8                                    | 299                               | 44.3/Ws: 69.3                                          | 176                                                              | PPT                                 |
| <b>CS24046</b> | <b>T-FGC846B</b>           | <b><i>SDG22</i></b> | <b>21.4/Ws: 72.2</b>                   | <b>281</b>                           | <b>46.9/Ws: 59.3</b>                             | <b>299</b>                        | <b>47.2/Ws: 60.0</b>                                   | <b>316</b>                                                       | <b>PPT</b>                          |
| CS24001        | T-FGC846A                  | <i>SDG22</i>        | 63.1/Ws: 60.4                          | 293                                  | 78.5/Ws: 76.0                                    | 311                               | 58.6/Ws: 78.2                                          | 191                                                              | PPT                                 |
|                | T-FGC900C                  | <i>SDG25</i>        | 43.0/Ws: 60.4                          | 251                                  | 41.8/Ws: 76.0                                    | 359                               | 51.8/Ws: 78.2                                          | 222                                                              | PPT                                 |
|                | T-FGC900D                  | <i>SDG25</i>        | 57.5/Ws: 69.1                          | 255                                  | 41.9/Ws: 74.8                                    | 308                               | 58.4/Ws: 69.3                                          | 262                                                              | PPT                                 |
|                | T-FGC900A                  | <i>SDG25</i>        | 50.8/Ws: 69.1                          | 264                                  | 45.1/Ws: 74.8                                    | 306                               | 65.1/Ws: 69.3                                          | 281                                                              | PPT                                 |
|                | T-FGC900B                  | <i>SDG25</i>        | 44.8/Ws: 69.1                          | 261                                  | 45.5/Ws: 74.8                                    | 314                               | 63.2/Ws: 69.3                                          | 340                                                              | PPT                                 |
| CS23956        | T-FGC821Am                 | <i>SDG26</i>        | 63.2/Ws: 81.0                          | 291                                  | 76.4/Ws: 85.1                                    | 495                               | 76.4/Ws: 82.2                                          | 402                                                              | PPT                                 |
|                | T-FGC821D                  | <i>SDG26</i>        | 69.0/Ws: 81.0                          | 371                                  | 62.6/Ws: 85.1                                    | 535                               | 78.3/Ws: 82.2                                          | 438                                                              | PPT                                 |
| CS24003        | T-FGC821C                  | <i>SDG26</i>        | 53.6/Ws: 60.4                          | 235                                  | 71.4/Ws: 76.0                                    | 367                               | 75.9/Ws: 78.2                                          | 245                                                              | PPT                                 |
| CS24002        | T-FGC821B                  | <i>SDG26</i>        | 47.4/Ws: 60.4                          | 226                                  | 84.4/Ws: 76.0                                    | 302                               | 49.4/Ws: 78.2                                          | 245                                                              | PPT                                 |
| <b>CS24004</b> | <b>T-FGC877A</b>           | <b><i>SDG29</i></b> | <b>28.3/Ws: 69.1</b>                   | <b>244</b>                           | <b>50.0/Ws: 74.8</b>                             | <b>286</b>                        | <b>31.4/Ws: 69.3</b>                                   | <b>401</b>                                                       | <b>PPT</b>                          |
| CS24006        | T-FGC877C                  | <i>SDG29</i>        | 41.6/Ws: 69.1                          | 339                                  | 46.0/Ws: 74.8                                    | 361                               | 52.2/Ws: 69.3                                          | 224                                                              | PPT                                 |
| CS24005        | T-FGC877B                  | <i>SDG29</i>        | 57.5/Ws: 69.1                          | 299                                  | 46.2/Ws: 74.8                                    | 314                               | 60.8/Ws: 69.3                                          | 306                                                              | PPT                                 |
|                | T-FGC783A                  | <i>SDG3</i>         | 40.2/Ws: 69.9                          | 341                                  | 51.6/Ws: 66.3                                    | 417                               | 49.0/Ws: 67.6                                          | 290                                                              | PPT                                 |
| CS24010        | T-FGC990A                  | <i>SDG34</i>        | 54.2/Ws: 69.1                          | 273                                  | 52.0/Ws: 74.8                                    | 437                               | 58.0/Ws: 69.3                                          | 264                                                              | PPT                                 |
| CS24011        | T-FGC990Bm                 | <i>SDG34</i>        | 62.9/Ws: 69.1                          | 345                                  | 55.8/Ws: 74.8                                    | 330                               | 71.7/Ws: 69.3                                          | 329                                                              | PPT                                 |
| CS24012        | T-FGC990Cm                 | <i>SDG34</i>        | 50.6/Ws: 69.1                          | 267                                  | 40.9/Ws: 74.8                                    | 281                               | 55.1/Ws: 69.3                                          | 314                                                              | PPT                                 |
| CS23948        | T-FGC800A                  | <i>SDG7</i>         | 72.2/Ws: 69.9                          | 413                                  | 57.0/Ws: 66.3                                    | 467                               | 57.4/Ws: 67.6                                          | 366                                                              | PPT                                 |
| CS23998        | T-FGC803A                  | <i>SDG8</i>         | 56.8/Ws: 69.1                          | 289                                  | 74.3/Ws: 74.8                                    | 413                               | 51.1/Ws: 69.3                                          | 321                                                              | PPT                                 |
| CS23949        | T-FGC801A                  | <i>SDG9</i>         | 47.9/Ws: 69.9                          | 311                                  | 47.6/Ws: 66.3                                    | 273                               | 61.0/Ws: 67.6                                          | 368                                                              | PPT                                 |

| ABRC stock no. | Univ. of Arizona stock no. | Gene symbol        | Tumorigenesis* (A208) mutant/wild-type | No. of root segments assayed: tumors | Transient GUS activity* (At849) mutant/wild-type | No. of root segments assayed: GUS | Ppt or Kan-resistance* (At872 or 849) mutant/wild-type | No. of root segments assayed: Ppt <sup>r</sup> /Kan <sup>r</sup> | Resistance of the line <sup>†</sup> |
|----------------|----------------------------|--------------------|----------------------------------------|--------------------------------------|--------------------------------------------------|-----------------------------------|--------------------------------------------------------|------------------------------------------------------------------|-------------------------------------|
|                | T-FGC801D                  | <i>SDG9</i>        | 47.6/Ws: 69.9                          | 410                                  | 41.9/Ws: 66.3                                    | 403                               | 65.3/Ws: 67.6                                          | 268                                                              | PPT                                 |
| CS23950        | T-FGC801B                  | <i>SDG9</i>        | 70.5/Ws: 72.2                          | 352                                  | 56.9/Ws: 59.3                                    | 339                               | 51.8/Ws: 60.0                                          | 340                                                              | PPT                                 |
| CS23951        | T-FGC801Cm                 | <i>SDG9</i>        | 48.8/Ws: 72.2                          | 248                                  | 45.5/Ws: 59.3                                    | 233                               | 72.1/Ws: 60.0                                          | 322                                                              | PPT                                 |
| <b>CS30921</b> | <b>TFGC524C</b>            | <b><i>SGA1</i></b> | <b>10.5/Ws: 82.0</b>                   | <b>582</b>                           | <b>19.4/Ws: 61.3</b>                             | <b>825</b>                        | <b>18.4/Ws: 56.2</b>                                   | <b>397</b>                                                       | <b>HPT</b>                          |
| <b>CS3995</b>  | <b>TFGC524A</b>            | <b><i>SGA1</i></b> | <b>29.3/Ws: 72.6</b>                   | <b>783</b>                           | <b>54.5/Ws: 80.7</b>                             | <b>636</b>                        | <b>51.1/Ws: 60.6</b>                                   | <b>406</b>                                                       | <b>HPT</b>                          |
| <b>CS3996</b>  | <b>TFGC524B</b>            | <b><i>SGA1</i></b> | <b>10.8/Ws: 72.8</b>                   | <b>798</b>                           | <b>26.5/Ws: 80.0</b>                             | <b>666</b>                        | <b>40.8/Ws: 60.1</b>                                   | <b>369</b>                                                       | <b>HPT</b>                          |
| CS23957        | T-FGC449A                  | <i>SGB1</i>        | 61.4/Ws: 69.6                          | 171                                  | 64.8/Ws: 79.0                                    | 446                               | 80.5/Ws: 81.4                                          | 287                                                              | HYG                                 |
| CS24009        | T-FGC985C                  | <i>SGB2</i>        | 45.9/Ws: 69.1                          | 283                                  | 47.0/Ws: 74.8                                    | 383                               | 52.6/Ws: 69.3                                          | 228                                                              | PPT                                 |
| CS24007        | T-FGC985A                  | <i>SGB2</i>        | 47.3/Ws: 69.1                          | 357                                  | 72.5/Ws: 74.8                                    | 316                               | 60.0/Ws: 69.3                                          | 335                                                              | PPT                                 |
| <b>CS24008</b> | <b>T-FGC985B</b>           | <b><i>SGB2</i></b> | <b>20.3/Ws: 69.1</b>                   | <b>261</b>                           | <b>16.5/Ws: 74.8</b>                             | <b>267</b>                        | <b>30.2/Ws: 69.3</b>                                   | <b>255</b>                                                       | <b>PPT</b>                          |
| CS24013        | T-FGC995A                  | <i>SGF1</i>        | 67.1/Ws: 69.1                          | 246                                  | 61.3/Ws: 74.8                                    | 292                               | 55.0/Ws: 69.3                                          | 262                                                              | PPT                                 |
| CS24014        | T-FGC995B                  | <i>SGF1</i>        | 61.9/Ws: 69.1                          | 328                                  | 68.1/Ws: 74.8                                    | 492                               | 56.5/Ws: 69.3                                          | 253                                                              | PPT                                 |
| CS24015        | T-FGC995C                  | <i>SGF1</i>        | 45.1/Ws: 69.1                          | 233                                  | 61.2/Ws: 74.8                                    | 327                               | 50.8/Ws: 69.3                                          | 260                                                              | PPT                                 |
|                | T-FGC675Am                 | <i>SRT1</i>        | 40.0/Ws: 81.0                          | 287                                  | 42.2/Ws: 85.1                                    | 490                               | 72.1/Ws: 82.2                                          | 463                                                              | PPT                                 |
|                | T-FGC675B                  | <i>SRT1</i>        | 47.9/Ws: 81.0                          | 340                                  | 47.7/Ws: 85.1                                    | 509                               | 77.9/Ws: 82.2                                          | 457                                                              | PPT                                 |
|                | T-FGC675C                  | <i>SRT1</i>        | 56.7/Ws: 81.0                          | 379                                  | 60.2/Ws: 85.1                                    | 392                               | 76.9/Ws: 82.2                                          | 425                                                              | PPT                                 |
|                | T-FGC675D                  | <i>SRT1</i>        | 49.1/Ws: 81.0                          | 328                                  | 65.5/Ws: 85.1                                    | 304                               | 73.8/Ws: 82.2                                          | 386                                                              | PPT                                 |
| 340            |                            |                    |                                        | 101892                               |                                                  | 108738                            |                                                        | 101734                                                           |                                     |

Bold-face indicates *rat* mutant lines; red colored data indicate the weighted mean from two or more tests; blue colored data indicate that the mutant scores >50% of wild-type but still displays a *rat* mutant phenotype.

\*Percentage of mutant root segments displaying the phenotype compared with the percentage of wild-type root segments displaying the phenotype.

<sup>†</sup>HYG indicates hygromycin resistance. Germinate seeds in B5 medium + 20 mg /liter hygromycin; PPT indicates phosphinothricin resistance. Germinate seeds in B5 + 10 mg /liter phosphinothricin; Hygromycin-resistant calli were screened for second transformation with PPT. PPT-resistant calli were screened for second transformation with kanamycin.
