# Supplementary material
Source: PubMed Central journal article supplement (PMC1986629)

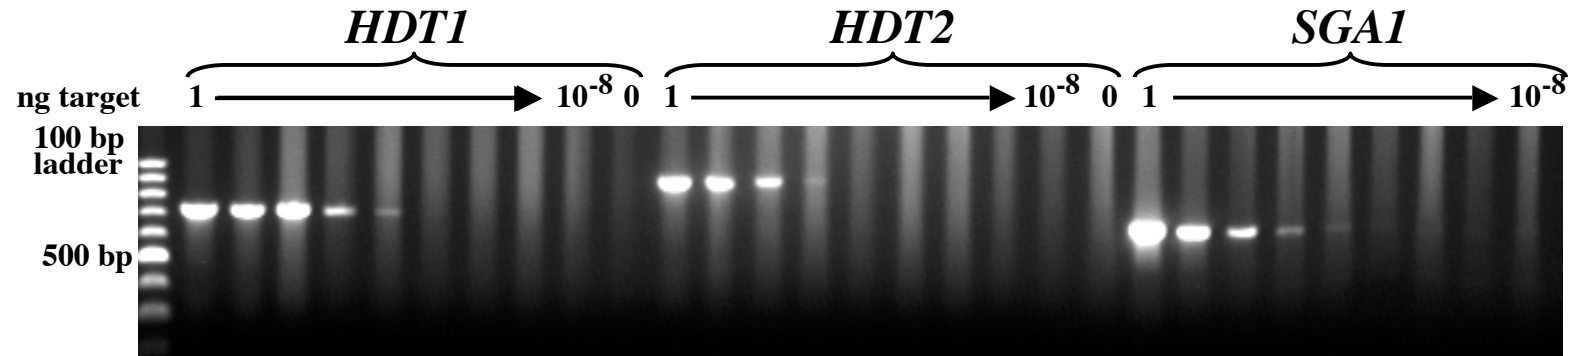

**20 Cycles**

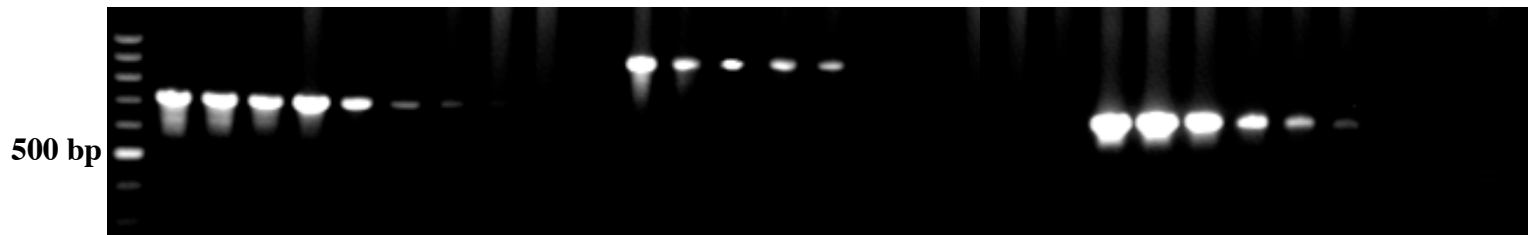

**30 Cycles**

Supplement: pnas_0706986104_1.pdf [file pnas_0706986104_1.pdf]
